# Supplementary material for: IMPA2 Downregulation Enhances mTORC1 Activity and Restrains Autophagy Initiation in Metastatic Clear Cell Renal Cell Carcinoma
Source: PubMed Central journal article supplement (PMC7230261; doi:10.3390/jcm9040956), 2020-03-30
Supplement: jcm-09-00956-s001.pdf [file jcm-09-00956-s001.pdf]

**Supplementary Table S1.** Cox univariable and multivariable analyses under the condition of overall survival probability in association with *IMPA2/mTORC1* geneset mRNA expression levels and pathological stage derived TCGA cohort with clear-cell renal cell carcinoma.

| Overall Survival ( <i>n</i> = 493) |                            |          |                              |          |
|------------------------------------|----------------------------|----------|------------------------------|----------|
| Variables                          | Univariable<br>(HR, 95%CI) | <i>P</i> | Multivariable<br>(HR, 95%CI) | <i>P</i> |
| Age                                |                            |          |                              |          |
| <60                                | 1                          | NA       | 1                            | NA       |
| ≥60                                | 1.76 (1.29–2.40)           | <0.001   | 1.66 (1.21–2.28)             | 0.002    |
| gender                             |                            |          |                              |          |
| female                             | 1                          | NA       | 1                            | NA       |
| male                               | 0.94 (0.69–1.28)           | 0.690    | 0.81 (0.58–1.12)             | 0.207    |
| pT                                 |                            |          |                              |          |
| T1-T2                              | 1                          | NA       | 1                            | NA       |
| T3-T4                              | 3.02 (2.22–4.11)           | <0.001   | 0.51 (0.43–1.53)             | 0.516    |
| pM                                 |                            |          |                              |          |
| M0                                 | 1                          | NA       | 1                            | NA       |
| M1                                 | 4.27 (3.12–5.83)           | <0.001   | 2.28 (1.54–3.38)             | <0.001   |
| stage                              |                            |          |                              |          |
| I-II                               | 1                          | NA       | 1                            | NA       |
| III-IV                             | 3.62 (2.64–4.99)           | <0.001   | 2.31 (1.12–4.76)             | 0.023    |
| grade                              |                            |          |                              |          |
| I-II                               | 1                          | NA       | 1                            | NA       |
| III-IV                             | 2.57 (1.83–3.61)           | <0.001   | 1.50 (1.03–2.18)             | 0.034    |
| <i>IMPA2</i> levels                |                            |          |                              |          |
| High                               | 1                          | NA       | 1                            | NA       |
| Low                                | 2.02 (1.48–2.77)           | <0.001   | 1.54 (1.09–2.16)             | 0.014    |
| mTORC1 levels                      |                            |          |                              |          |
| Low                                | 1                          | NA       | 1                            | NA       |
| High                               | 1.83 (1.34–2.49)           | <0.001   | 1.33 (0.96–1.85)             | 0.085    |
| <i>IMPA2/mTORC1</i> levels         |                            |          |                              |          |
| High/Low                           | 1                          | NA       | 1                            | NA       |
| Low/High                           | 3.06 (2.00–4.68)           | <0.001   | 1.10 (0.79–1.52)             | 0.578    |

HR and CI denote hazard ratio and confident interval, respectively.

**Supplementary Table S2.** The relationship between *IMPA2*/mTORC1 geneset levels and the clinicopathological characteristics of TCGA cohort with clear cell renal cell carcinoma.

| Clinicopathological Characteristics | <i>n</i> | <i>IMPA2</i> /mTORC1 Geneset Levels, <i>n</i> (%) |                             |                               | <i>P</i> <sup>a</sup> |
|-------------------------------------|----------|---------------------------------------------------|-----------------------------|-------------------------------|-----------------------|
|                                     |          | High/Low<br>( <i>n</i> = 143)                     | Others<br>( <i>n</i> = 208) | Low/High<br>( <i>n</i> = 142) |                       |
| Age                                 |          |                                                   |                             |                               |                       |
| <60                                 | 244      | 72(29.5%)                                         | 105(43.0%)                  | 67(27.5%)                     | 0.808                 |
| ≥60                                 | 249      | 71(28.5%)                                         | 103(41.4%)                  | 75(30.1%)                     |                       |
| gender                              |          |                                                   |                             |                               |                       |
| female                              | 168      | 70(41.7%)                                         | 64(38.1%)                   | 34(20.2%)                     | <0.001                |
| male                                | 325      | 73(22.5%)                                         | 144(44.3%)                  | 108(33.2%)                    |                       |
| pT                                  |          |                                                   |                             |                               |                       |
| T1-T2                               | 308      | 109(35.4%)                                        | 133(43.2%)                  | 66(21.4%)                     | <0.001                |
| T3-T4                               | 185      | 34(18.4%)                                         | 75(40.5%)                   | 76(41.1%)                     |                       |
| pM                                  |          |                                                   |                             |                               |                       |
| M0                                  | 415      | 132(31.8%)                                        | 178(42.9%)                  | 105(25.3%)                    | <0.001                |
| M1                                  | 78       | 11(14.1%)                                         | 30(38.5%)                   | 37(47.4%)                     |                       |
| stage                               |          |                                                   |                             |                               |                       |
| I-II                                | 291      | 105(36.1%)                                        | 123(42.3%)                  | 63(21.6%)                     | <0.001                |
| III-IV                              | 202      | 38(18.8%)                                         | 85(42.1%)                   | 79(39.1%)                     |                       |
| grade                               |          |                                                   |                             |                               |                       |
| G1-G2                               | 224      | 86(38.4%)                                         | 100(44.6%)                  | 38(17.0%)                     | <0.001                |
| G3-G4                               | 269      | 57(21.2%)                                         | 108(40.1%)                  | 104(38.7%)                    |                       |

<sup>a</sup>*P* values were derived with a two-sided Pearson chi-square test.
